# Supplementary material for: AQP1-Containing Exosomes in Peritoneal Dialysis Effluent As Biomarker of Dialysis Efficiency
Source: MDPI journal article supplement (doi:10.3390/cells8040330), 2019-04-09
Supplement: s1 [file s1]

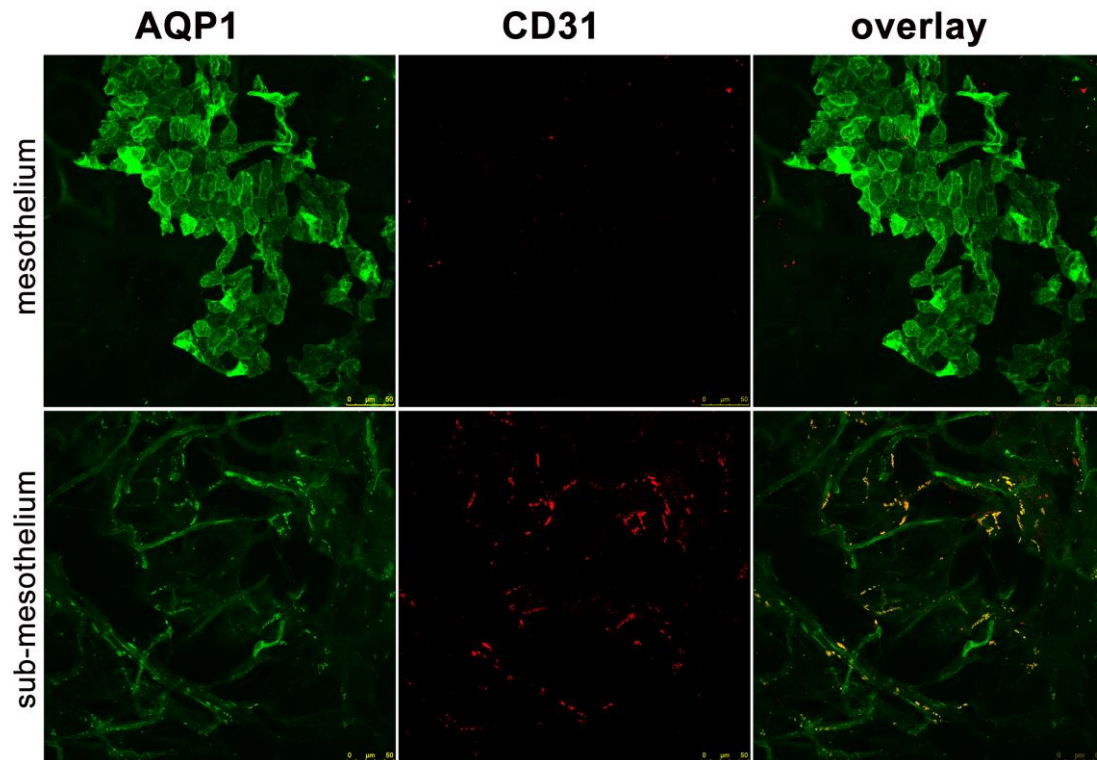

**Supplemental Fig. 1**

**Supplemental Figure. S1** Human omental biopsies were stained with anti AQP1 antibodies (green) and anti-CD31 antibodies (red). In the mesothelial layer, AQP1 stained the plasma membrane of mesothelial cells that were negative for CD31 expression. A confocal scan taken in the submesothelial space showed co-localization of AQP1 and CD31 in the capillaries.
